# Supplementary material for: Elucidating the effects of individual components in KxMnOy/SiO2and water on selectivity enhancement in the oxidative coupling of methane
Source: Royal Society of Chemistry journal article supplement (doi:10.1039/d1cy01081f), 2021-01-01
Supplement: d1cy01081f1.pdf [file d1cy01081f1.pdf]

## Electronic Supplementary Information

### Elucidating the effects of individual components in $K_xMnO_y/SiO_2$ and water on selectivity enhancement in the oxidative coupling of methane

Zeynep Aydin, Anna Zanina, Vita A. Kondratenko, Reinhard Eckelt, Stephan Bartling, Henrik Lund, Nils Rockstroh, Carsten R. Kreyenschulte, David Linke, Evgenii V. Kondratenko\*

Leibniz Institut für Katalyse e.V. Albert-Einstein-Str. 29a, 18059 Rostock, Germany

\* Corresponding Author: [evgenii.kondratenko@catalysis.de](mailto:evgenii.kondratenko@catalysis.de); phone: +49(381)1281-290.

## Table of content

Mears Criterion for External Diffusion Limitations

Weisz-Prater criterion for Internal Diffusion Limitations

Mears Criterion for External Heat Transfer Limitations

**Table S1.** BET surface area of  $K_yMnO_4/SiO_2$  ( $y = 1$  or  $2$ ) before and after OCM reaction without  $H_2O$  (1<sup>st</sup> dry cycle after 6 h) and with  $H_2O$  (in steady state after 120 h).

**Table S2.** Near-surface composition (wt%) of  $K_yMnO_4/SiO_2$  ( $y = 1$  or  $2$ ) with different wt% of  $K_yMnO_4$  ( $y = 1$  or  $2$ ) before and after OCM reaction without  $H_2O$  (1<sup>st</sup> dry cycle after 6 h) and with  $H_2O$  (in steady state after 120 h) as determined by XPS.

**Figure S1.** Determination of the methane conversion rate  $r(CH_4)$  from the correlation between the methane conversion  $X(CH_4)$  and the contact time  $\tau$ .

**Figure S2.** Representative STEM-HAADF images and EDX spectra of  $10K_2MnO_4/SiO_2$  (a-d) before and (e-h) after OCM reaction with co-fed  $H_2O$ .

**Figure S3.** Representative STEM-HAADF images of  $8KMnO_4/SiO_2$  and EDX spectra (a-d) before and (e-h) after OCM reaction with co-fed  $H_2O$ .

**Figure S4.** XRD patterns of (a)  $5K_2MnO_4/SiO_2$ , (b)  $20K_2MnO_4/SiO_2$ , (c)  $4KMnO_4/SiO_2$  and (d)  $16KMnO_4/SiO_2$  (i,iii,v,vii) before, (ii,iv,vi,viii) after OCM reaction with  $H_2O$ .

**Figure S5.** XRD patterns of (a)  $SiO_2$ , (b)  $3Mn/SiO_2$  and (c)  $5K_2O/SiO_2$  (i,iii,iv,vi) before, (ii,v,vii) after OCM reaction with  $H_2O$ .

**Figure S6.** (a,b) The overall rate of methane conversion and (c,d) selectivity to  $C_{2+}$  hydrocarbons over time on stream over (a,c)  $5K_2MnO_4/SiO_2$  and (b,d)  $20K_2MnO_4/SiO_2$  without (empty symbols) and with 30 vol% (filled symbols) water.

**Figure S7.** (a,b) The overall rate of methane conversion and (c,d) selectivity to C<sub>2+</sub> hydrocarbons over time on stream over (a,c) 4KMnO<sub>4</sub>/SiO<sub>2</sub> and (b,d) 16KMnO<sub>4</sub>/SiO<sub>2</sub> without (empty symbols) and with 30 vol% (filled symbols) water.

**Figure S8.** The selectivity to C<sub>2</sub>H<sub>6</sub>, C<sub>2</sub>H<sub>4</sub>, CO<sub>2</sub> and CO as function of methane conversion over 5K<sub>2</sub>MnO<sub>4</sub>/SiO<sub>2</sub> at 800 °C without and with 30 vol% H<sub>2</sub>O.

**Figure S9.** The selectivity to C<sub>2</sub>H<sub>6</sub>, C<sub>2</sub>H<sub>4</sub>, CO<sub>2</sub> and CO as function of methane conversion over 4KMnO<sub>4</sub>/SiO<sub>2</sub> and 16KMnO<sub>4</sub>/SiO<sub>2</sub> at 800 °C without and with 30 vol% H<sub>2</sub>O.

**Figure S10.** The methane conversion rate into C<sub>2</sub>, CO<sub>2</sub> and CO for the OCM reaction without (white bars) and with 30 vol% (black bars) co-fed H<sub>2</sub>O over different catalysts at 800 °C in steady state.

**Figure S11.** Height-normalized transient responses of carbon-containing products after pulsing of (a-c) <sup>18</sup>O<sub>2</sub>:CH<sub>4</sub>:He = 1:8:2 or (d-f) <sup>18</sup>O<sub>2</sub>:CH<sub>4</sub>:H<sub>2</sub>O:He = 1:8:0.85:2 mixtures at 800°C over different catalysts.

## Mears Criterion for External Diffusion Limitations

To estimate the influence of external diffusion limitations, the Mears criterion was applied:

$$\frac{r_{obs} \cdot \rho_{catalyst} \cdot R \cdot n}{k_c \cdot C} < 0.15$$

$r_{obs}$  – measured reaction rate, kmol/(kg<sub>cat</sub>·s)

$\rho_{catalyst}$  – catalyst density, kg/m<sup>3</sup>

$R$  – catalyst pellet radius, m

$n$  – reaction order

$k_c$  – mass transfer coefficient, m/s

$C$  – bulk concentration of reactant, kmol/m<sup>3</sup>

For the OCM reaction at 800 °C over 10K<sub>2</sub>MnO<sub>4</sub>/SiO<sub>2</sub> follows for the highest activity:

$$\frac{r_{obs} \cdot \rho_{catalyst} \cdot R \cdot n}{k_c \cdot C} = [5.67 \cdot 10^{-7} \text{ kmol}/(\text{kg}_{\text{cat}} \cdot \text{s})] \cdot [1.12 \cdot 10^3 \text{ kg}/\text{m}^3] \cdot [2 \cdot 10^{-4} \text{ m}] \cdot 2 / ([1.90 \cdot 10^{-1} \text{ m}/\text{s}] \cdot [4.49 \cdot 10^{-3} \text{ kmol}/\text{m}^3]) = \mathbf{2.99 \cdot 10^{-4}} \ll \mathbf{0.15}$$

For the OCM reaction at 800 °C over 8KMnO<sub>4</sub>/SiO<sub>2</sub> follows for the highest activity:

$$\frac{r_{obs} \cdot \rho_{catalyst} \cdot R \cdot n}{k_c \cdot C} = [8.83 \cdot 10^{-6} \text{ kmol}/(\text{kg}_{\text{cat}} \cdot \text{s})] \cdot [7.51 \cdot 10^2 \text{ kg}/\text{m}^3] \cdot [2 \cdot 10^{-4} \text{ m}] \cdot 2 / ([1.09 \cdot 10^{-1} \text{ m}/\text{s}] \cdot [4.49 \cdot 10^{-3} \text{ kmol}/\text{m}^3]) = \mathbf{5.4 \cdot 10^{-3}} \ll \mathbf{0.15}$$

## Weisz-Prater criterion for Internal Diffusion Limitations

To estimate the influence of internal diffusion on the reaction rates, the Weisz-Prater criterion was applied:

$$\Psi = \frac{n+1}{2} \cdot \frac{r_{obs} \cdot \rho_{catalyst} \cdot R^2}{D \cdot C} \quad (\text{S1})$$

If  $\Psi < 1$ , internal diffusion limitations are negligible.

$n$  – reaction order

$r_{obs}$  – measured reaction rate, kmol/(kg<sub>cat</sub>·s)

$\rho_{catalyst}$  – catalyst density, kg/m<sup>3</sup>

$R$  – catalyst pellet radius, m

$D$  – diffusion coefficient, m<sup>2</sup>/s

$C$  – bulk concentration of reactant, kmol/m<sup>3</sup>

For the OCM reaction at 800 °C over 10K<sub>2</sub>MnO<sub>4</sub>/SiO<sub>2</sub> follows for the highest activity:

$$\Psi = [(2 + 1)/2] [5.67 \cdot 10^{-7} \text{ kmol}/(\text{kg}_{\text{cat}} \cdot \text{s})] \cdot [1.12 \cdot 10^3 \text{ kg}/\text{m}^3] \cdot [(2 \cdot 10^{-4})^2 \text{ m}^2] / ([1.7 \cdot 10^{-4} \text{ m}^2/\text{s}] \cdot [4.49 \cdot 10^{-3} \text{ kmol}/\text{m}^3]) = \mathbf{5.00 \cdot 10^{-5} < 1}$$

For the OCM reaction at 800 °C over 8KMnO<sub>4</sub>/SiO<sub>2</sub> follows for the highest activity:

$$\Psi = [(2 + 1)/2] [8.83 \cdot 10^{-6} \text{ kmol}/(\text{kg}_{\text{cat}} \cdot \text{s})] \cdot [7.51 \cdot 10^2 \text{ kg}/\text{m}^3] \cdot [(2 \cdot 10^{-4})^2 \text{ m}^2] / ([1.7 \cdot 10^{-4} \text{ m}^2/\text{s}] \cdot [4.49 \cdot 10^{-3} \text{ kmol}/\text{m}^3]) = \mathbf{5.22 \cdot 10^{-5} < 1}$$

### Mears Criterion for External Heat Transfer Limitations

The external heat transfer limitations were calculated as follows:

$$\frac{r_{obs} \cdot \rho_{catalyst} \cdot R \cdot E_a \cdot \Delta H}{k_g \cdot R_g \cdot T^2} < 0.15$$

$r_{obs}$  – measured reaction rate, kmol/(kg<sub>cat</sub>·s)

$\rho_{catalyst}$  – catalyst density, kg/m<sup>3</sup>

$R$  – catalyst pellet radius, m

$E_a$  – activation energy, kJ/kmol

$\Delta H$  – reaction heat, kJ/mol

$k_g$  – heat transport coefficient, kJ/(m<sup>2</sup>·s·K)

$R_g$  – gas constant, kJ/(mol·K)

$T$  – reaction temperature, K

For the OCM reaction at 800 °C over 10K<sub>2</sub>MnO<sub>4</sub>/SiO<sub>2</sub> follows for the highest activity:

$$\frac{r_{obs} \cdot \rho_{catalyst} \cdot R \cdot E_a \cdot \Delta H}{k_g \cdot R_g \cdot T^2} = [5.67 \cdot 10^{-7} \text{ kmol}/(\text{kg}_{\text{cat}} \cdot \text{s})] \cdot [1.12 \cdot 10^3 \text{ kg}/\text{m}^3] \cdot [2 \cdot 10^{-4} \text{ m}] \cdot [2.1 \cdot 10^5 \text{ kJ}/\text{kmol}] \cdot [8.09 \cdot 10^2 \text{ kJ}/\text{mol}] / ([1.38 \cdot 10^3 \text{ kJ}/(\text{m}^2 \cdot \text{s} \cdot \text{K})] \cdot [8.31 \cdot 10^{-3} \text{ kJ}/(\text{mol} \cdot \text{K})] \cdot [(1.07 \cdot 10^3)^2 \text{ K}^2]) = \mathbf{1.63 \cdot 10^{-6} < 0.15}$$

For the OCM reaction at 800 °C over 10K<sub>2</sub>MnO<sub>4</sub>/SiO<sub>2</sub> follows for the highest activity:

$$\frac{r_{obs} \cdot \rho_{catalyst} \cdot R \cdot E_a \cdot \Delta H}{k_g \cdot R_g \cdot T^2} = [8.83 \cdot 10^{-6} \text{ kmol}/(\text{kg}_{\text{cat}} \cdot \text{s})] \cdot [7.51 \cdot 10^2 \text{ kg}/\text{m}^3] \cdot [2 \cdot 10^{-4} \text{ m}] \cdot [1.2 \cdot 10^5 \text{ kJ}/\text{kmol}] \cdot [8.09 \cdot 10^2 \text{ kJ}/\text{mol}] / ([1.38 \cdot 10^3 \text{ kJ}/(\text{m}^2 \cdot \text{s} \cdot \text{K})] \cdot [8.31 \cdot 10^{-3} \text{ kJ}/(\text{mol} \cdot \text{K})] \cdot [(1.07 \cdot 10^3)^2 \text{ K}^2]) = \mathbf{2.51 \cdot 10^{-5} < 0.15}$$

**Table S1.** BET surface area of  $K_yMnO_4/SiO_2$  ( $y = 1$  or  $2$ ) before and after OCM reaction without  $H_2O$  (1<sup>st</sup> dry cycle after 6 h) and with  $H_2O$  (in steady state after 120 h).

| Catalysts                         | Specific surface area / $m^2/g$ |                                   |                                |
|-----------------------------------|---------------------------------|-----------------------------------|--------------------------------|
|                                   | before OCM reaction             | after OCM reaction without $H_2O$ | after OCM reaction with $H_2O$ |
| $5K_2MnO_4/SiO_2$                 | 2.92                            | 1.59                              | 0.36                           |
| $10K_2MnO_4/SiO_2$                | 0.87                            | 0.09                              | 0.06                           |
| $20K_2MnO_4/SiO_2$                | 0.19                            | 0.10                              | 0.15                           |
| $4KMnO_4/SiO_2$                   | 8.95                            | 5.09                              | 0.51                           |
| $8KMnO_4/SiO_2$                   | 5.34                            | 3.18                              | 0.36                           |
| $16KMnO_4/SiO_2$                  | 4.22                            | 1.33                              | 0.38                           |
| $SiO_2$ (amorphous)               | 272.3                           |                                   | 72.6                           |
| $SiO_2$ ( $\alpha$ -cristobalite) | 2.39                            |                                   |                                |
| $3Mn/SiO_2$                       | 158.00                          |                                   | 34.00                          |
| $5K_2O/SiO_2$                     | 0.17                            |                                   | 0.11                           |
| $3Mn-5K_2O/SiO_2$                 | 0.63                            | 0.47                              | 0.20                           |

**Table S2.** Near-surface composition (wt%) of  $K_yMnO_4/SiO_2$  ( $y = 1$  or  $2$ ) with different wt% of  $K_yMnO_4$  ( $y = 1$  or  $2$ ) before and after OCM reaction without  $H_2O$  (1<sup>st</sup> dry cycle after 6 h) and with  $H_2O$  (in steady state after 120 h) as determined by XPS. The corresponding bulk values determined by ICP-OES are given in the brackets.

| Catalysts                                           | Catalyst treatment                 | K          | Mn        | Si   | O    |
|-----------------------------------------------------|------------------------------------|------------|-----------|------|------|
| 5K <sub>2</sub> MnO <sub>4</sub> /SiO <sub>2</sub>  | Fresh sample                       | 6.9 (1.8)  | 1.6 (1.4) | 43.4 | 41.7 |
|                                                     | After OCM without H <sub>2</sub> O | 6.6        | 1.7       | 44.6 | 42.5 |
|                                                     | After OCM with H <sub>2</sub> O    | 6.2 (1.8)  | 1.9 (1.4) | 44.8 | 42.2 |
| 20K <sub>2</sub> MnO <sub>4</sub> /SiO <sub>2</sub> | Fresh sample                       | 14.6 (8.1) | 3.8 (5.7) | 36.6 | 37.7 |
|                                                     | After OCM without H <sub>2</sub> O | 13.2       | 3.7       | 35.5 | 39.6 |
|                                                     | After OCM with H <sub>2</sub> O    | 13.3 (8.1) | 3.9 (5.5) | 37.9 | 38.7 |
| 4KMnO <sub>4</sub> /SiO <sub>2</sub>                | Fresh sample                       | 3.4 (1.1)  | 2.2 (1.5) | 46.7 | 44.3 |
|                                                     | After OCM without H <sub>2</sub> O | 5.0        | 4.0       | 43.6 | 43.7 |
|                                                     | After OCM with H <sub>2</sub> O    | 7.7 (1.0)  | 6.1 (1.3) | 39.1 | 40.7 |
| 16KMnO <sub>4</sub> /SiO <sub>2</sub>               | Fresh sample                       | 5.7 (3.7)  | 2.6 (4.9) | 44.0 | 44.3 |
|                                                     | After OCM without H <sub>2</sub> O | 8.0        | 5.0       | 40.3 | 41.2 |
|                                                     | After OCM with H <sub>2</sub> O    | 7.7 (3.4)  | 6.5 (4.6) | 38.9 | 41.8 |

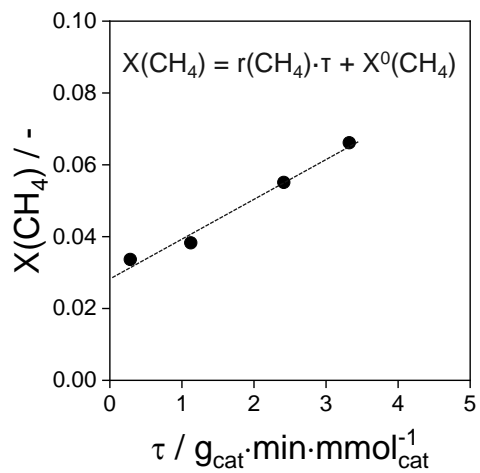

**Figure S1.** Determination of the methane conversion rate  $r(\text{CH}_4)$  from the correlation between the methane conversion  $X(\text{CH}_4)$  and the contact time  $\tau$ .



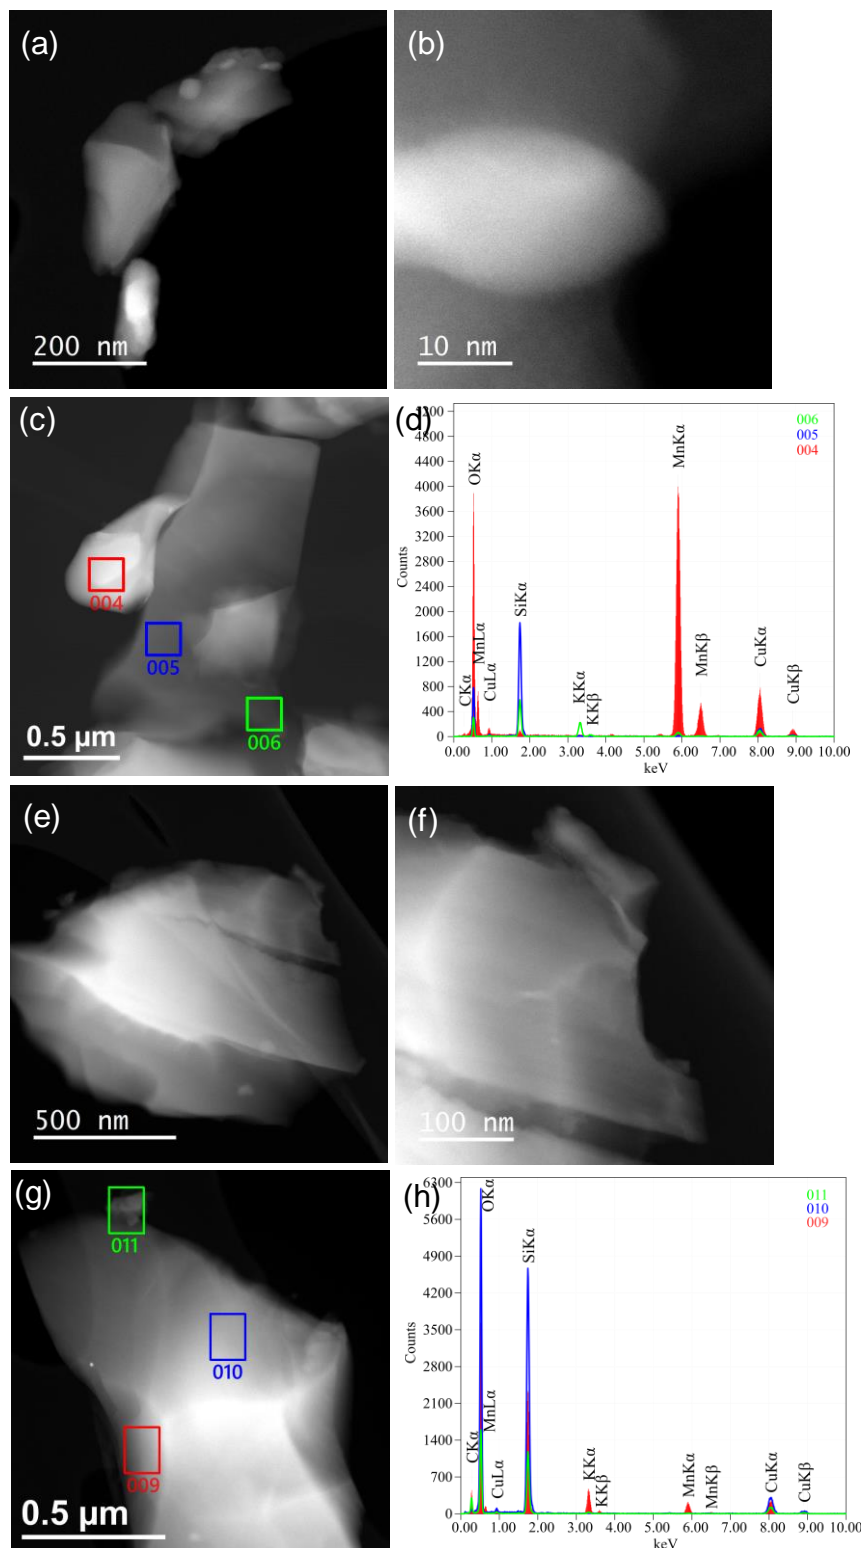

**Figure S2.** Representative STEM-HAADF images and EDX spectra of  $10\text{K}_2\text{MnO}_4/\text{SiO}_2$  (a-d) before and (e-h) after OCM reaction with co-fed  $\text{H}_2\text{O}$ .

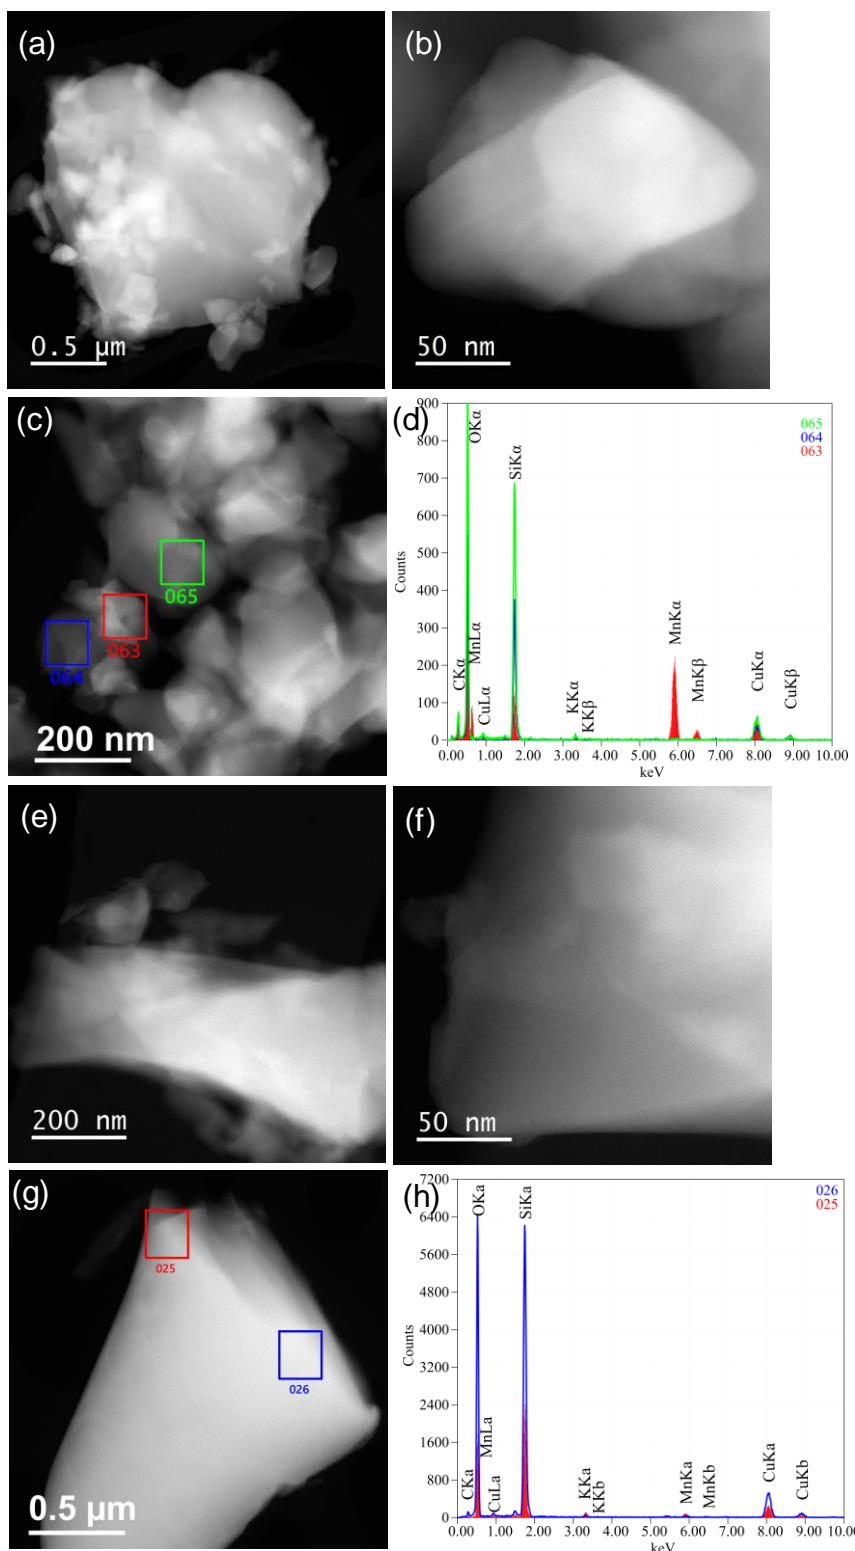

**Figure S3.** Representative STEM-HAADF images of 8KMnO<sub>4</sub>/SiO<sub>2</sub> and EDX spectra (a-d) before and (e-h) after OCM reaction with co-fed H<sub>2</sub>O.

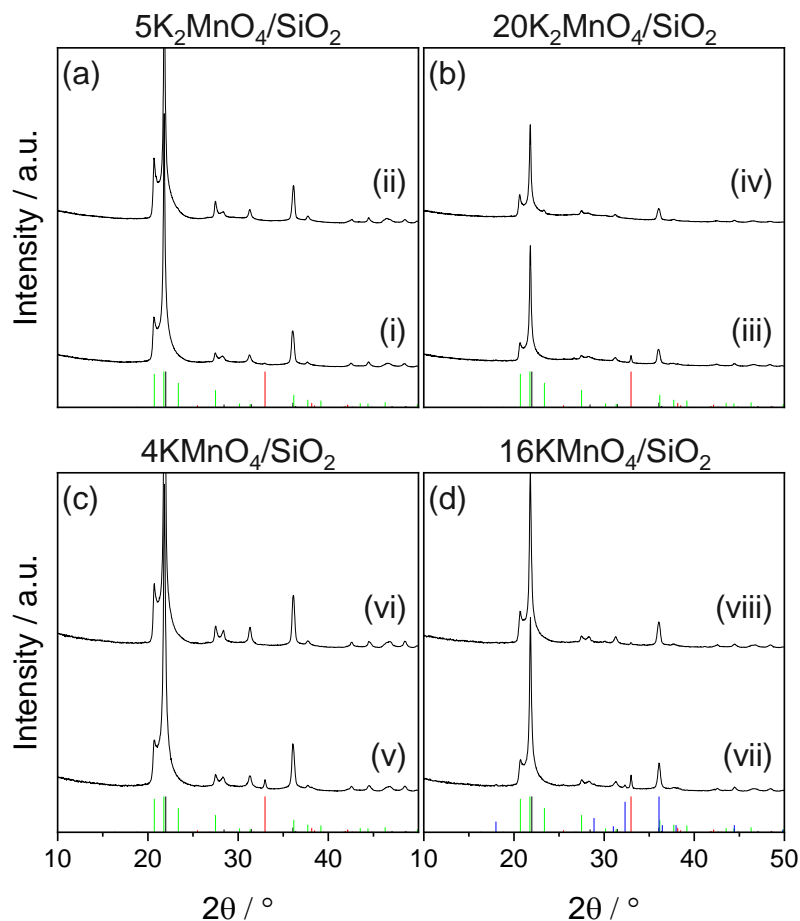

**Figure S4.** XRD patterns of (a)  $5\text{K}_2\text{MnO}_4/\text{SiO}_2$ , (b)  $20\text{K}_2\text{MnO}_4/\text{SiO}_2$ , (c)  $4\text{KMnO}_4/\text{SiO}_2$  and (d)  $16\text{KMnO}_4/\text{SiO}_2$  (i, iii, v, vii) before, (ii, iv, vi, viii) after OCM reaction with  $\text{H}_2\text{O}$ .  $\text{Mn}_7\text{O}_8(\text{SiO}_4)$  (red bars) (PDF-No. 01-089-5662),  $\text{Mn}_3\text{O}_4$  (blue bars) (PDF-No. 01-074-6605), tetragonal  $\text{SiO}_2$  (black bars) (PDF-No. 01-074-9378) and orthorhombic  $\text{SiO}_2$  (PDF-No. 00-042-1401) (green bars).

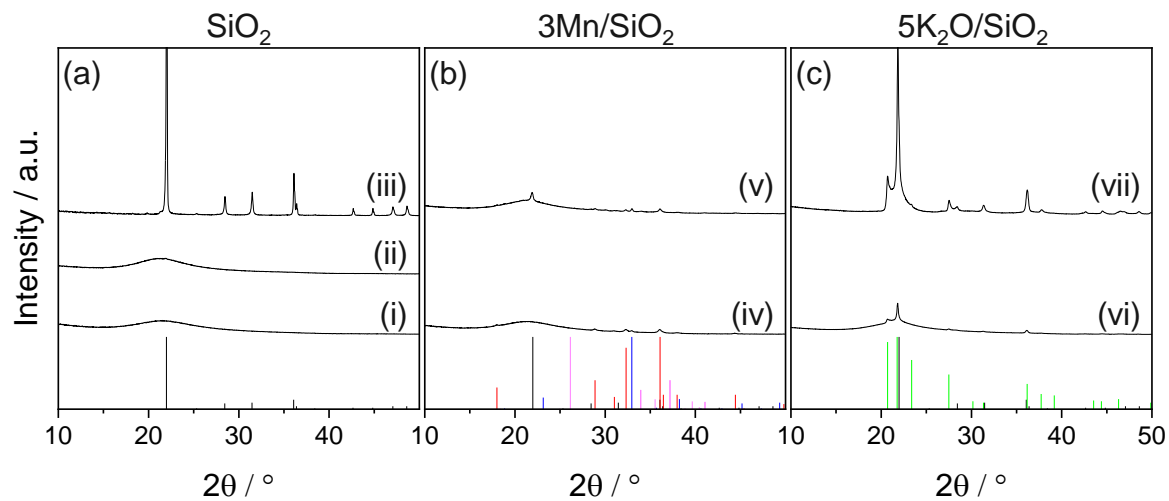

**Figure S5.** XRD patterns of (a)  $\text{SiO}_2$ , (b)  $3\text{Mn}/\text{SiO}_2$  and (c)  $5\text{K}_2\text{O}/\text{SiO}_2$  (i, iii, iv, vi) before, (ii, v, vii) after OCM reaction with  $\text{H}_2\text{O}$ . (iii) was calcined at  $1600\text{ }^\circ\text{C}$ , while all other samples were calcined at  $800\text{ }^\circ\text{C}$ . Tetragonal  $\text{SiO}_2$  (black bars) (PDF-No. 01-074-9378), orthorhombic  $\text{SiO}_2$  (PDF-No. 00-042-1401) (green bars),  $\text{Mn}_2\text{O}_3$  (blue bars) (PDF-No. 00-041-1442),  $\text{Mn}_3\text{O}_4$  (red bars) (PDF-No. 01-080-0382) and  $\text{MnO}(\text{OH})$  (purple bars) (PDF-No. 01-088-0649).

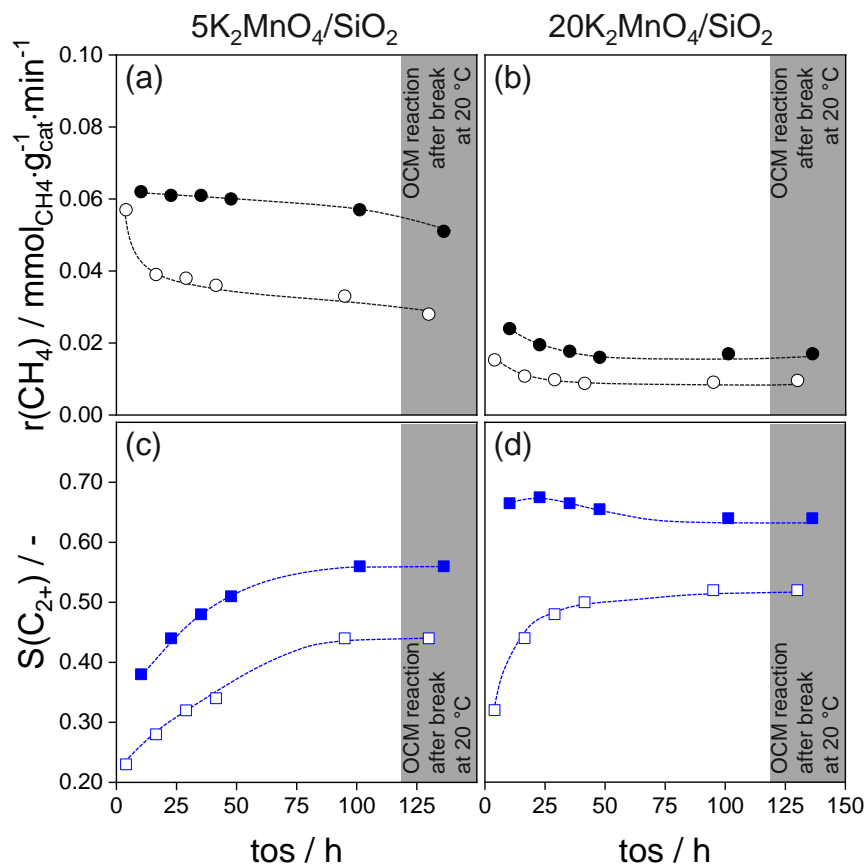

**Figure S6.** (a,b) The overall rate of methane conversion and (c,d) selectivity to  $\text{C}_{2+}$  hydrocarbons over time on stream over (a,c)  $5\text{K}_2\text{MnO}_4/\text{SiO}_2$  and (b,d)  $20\text{K}_2\text{MnO}_4/\text{SiO}_2$  without (empty symbols) and with 30 vol% (filled symbols) water; 800 °C,  $\text{CH}_4/\text{O}_2=8$ , 40 vol%  $\text{CH}_4$ ,  $X(\text{CH}_4) = 0.06$ ,  $0.3 \leq X(\text{O}_2) \leq 0.6$ .

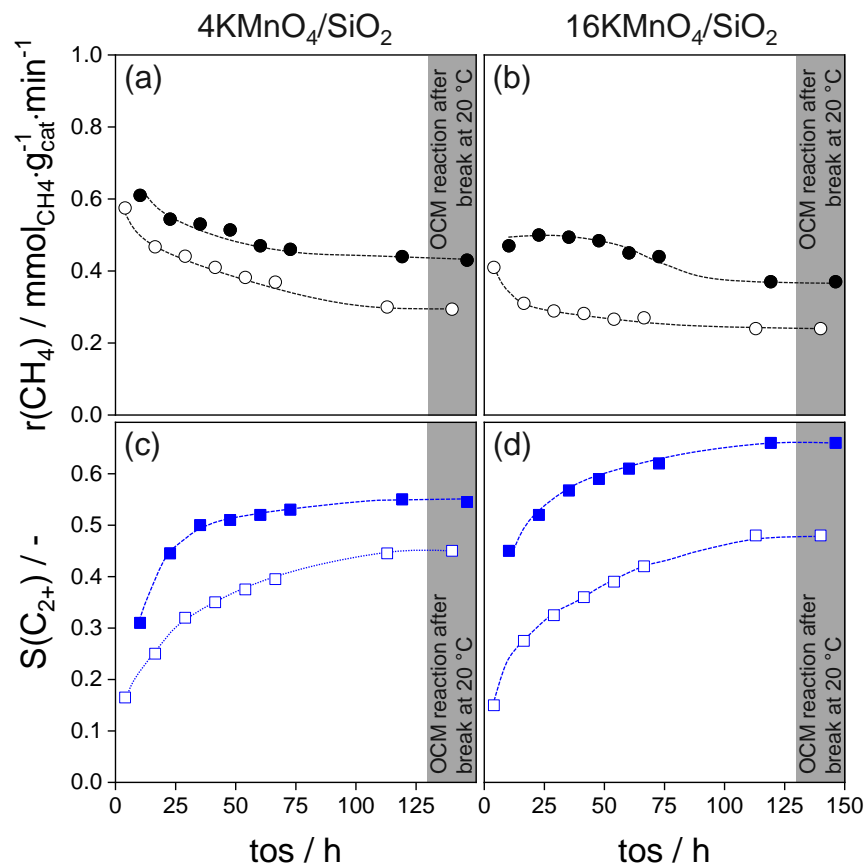

**Figure S7.** (a,b) The overall rate of methane conversion and (c,d) selectivity to  $\text{C}_{2+}$  hydrocarbons over time on stream over (a,c)  $4\text{KMnO}_4/\text{SiO}_2$  and (b,d)  $16\text{KMnO}_4/\text{SiO}_2$  without (empty symbols) and with 30 vol% (filled symbols) water; 800 °C,  $\text{CH}_4/\text{O}_2=8$ , 40 vol%  $\text{CH}_4$ ,  $X(\text{CH}_4)$  of 0.06,  $0.3 \leq X(\text{O}_2) \leq 0.6$ .

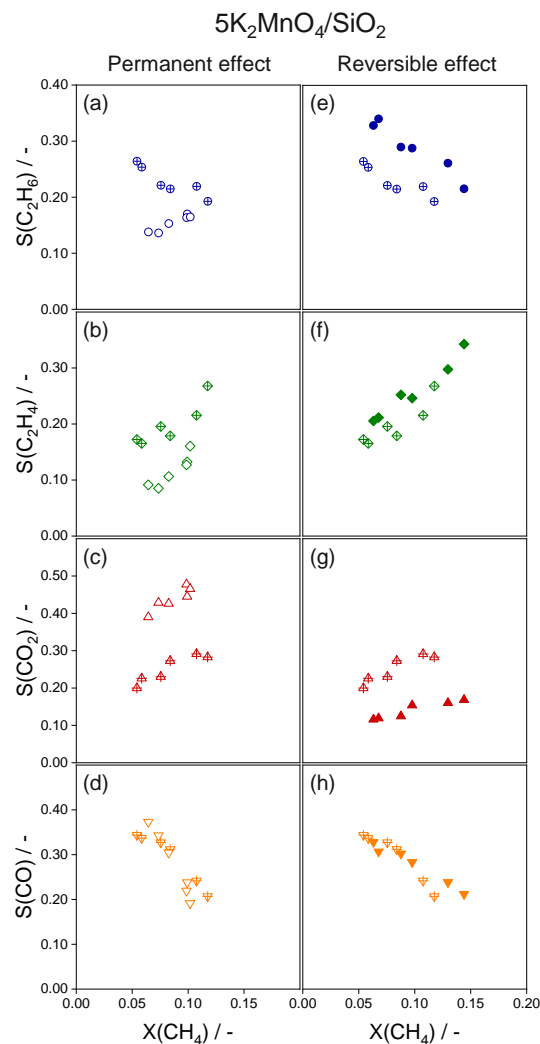

**Figure S8.** The selectivity to C<sub>2</sub>H<sub>6</sub>, C<sub>2</sub>H<sub>4</sub>, CO<sub>2</sub> and CO as function of methane conversion over 5K<sub>2</sub>MnO<sub>4</sub>/SiO<sub>2</sub> at 800 °C without and with 30 vol% H<sub>2</sub>O. (a-d) Permanent water effect is illustrated by comparison of the data under dry conditions from the 1<sup>st</sup> cycle (empty symbols) and 6<sup>th</sup> cycle (crossed symbols, after 114 h). (e-h) Reversible water effect is illustrated by the comparison of the data after 114 h under dry (crossed symbols) and after 120 h under wet (filled symbols) conditions;  $0.4 \leq X(\text{O}_2) \leq 1.0$ .

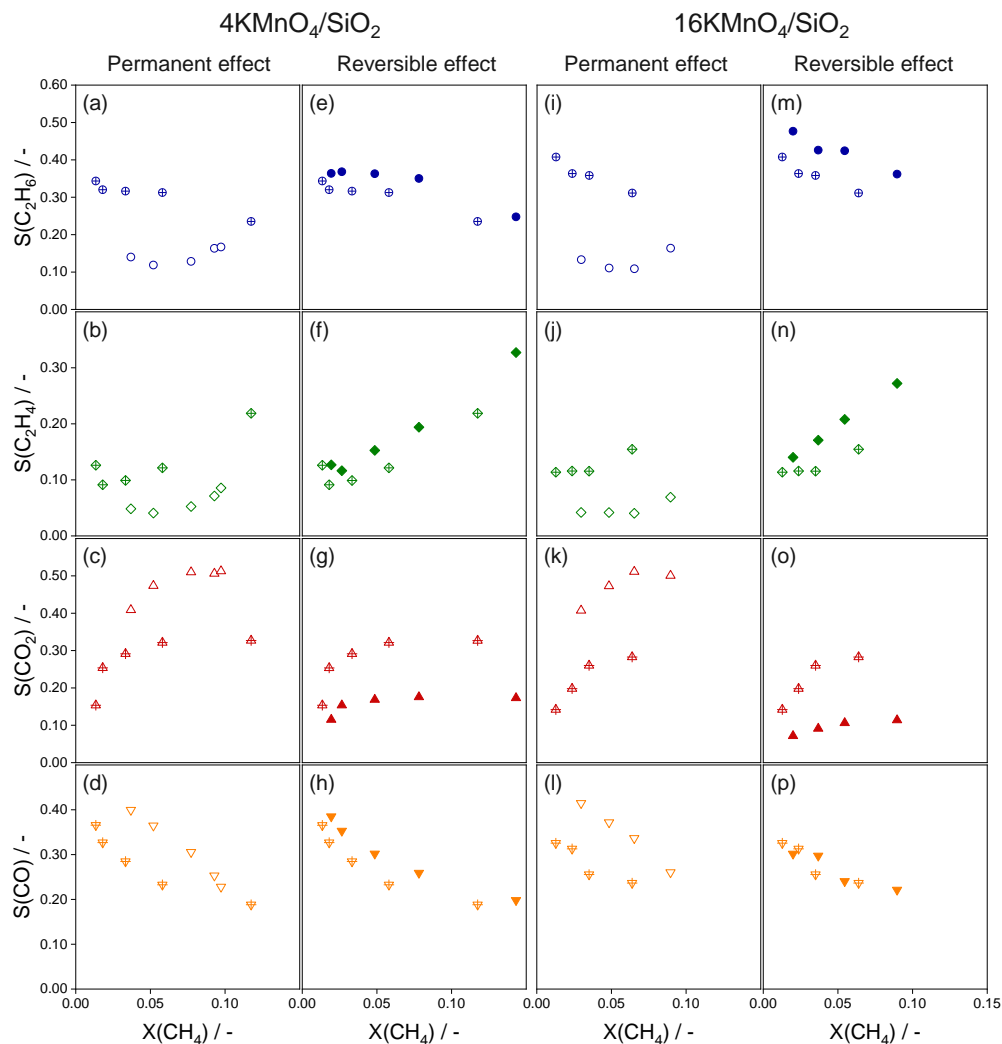

**Figure S9.** The selectivity to C<sub>2</sub>H<sub>6</sub>, C<sub>2</sub>H<sub>4</sub>, CO<sub>2</sub> and CO as function of methane conversion over 4KMnO<sub>4</sub>/SiO<sub>2</sub> and 16KMnO<sub>4</sub>/SiO<sub>2</sub> at 800 °C without and with 30 vol% H<sub>2</sub>O. (a-d, i-l) Permanent water effect is illustrated by comparison of the data under dry conditions from the 1<sup>st</sup> cycle (empty symbols) and 6<sup>th</sup> cycle (crossed symbols, after 114 h). (e-h, m-p) Reversible water effect is illustrated by the comparison of the data after 114 h under dry (crossed symbols) and after 120 h under wet (filled symbols) conditions;  $0.1 \leq X(\text{O}_2) \leq 1.0$ .



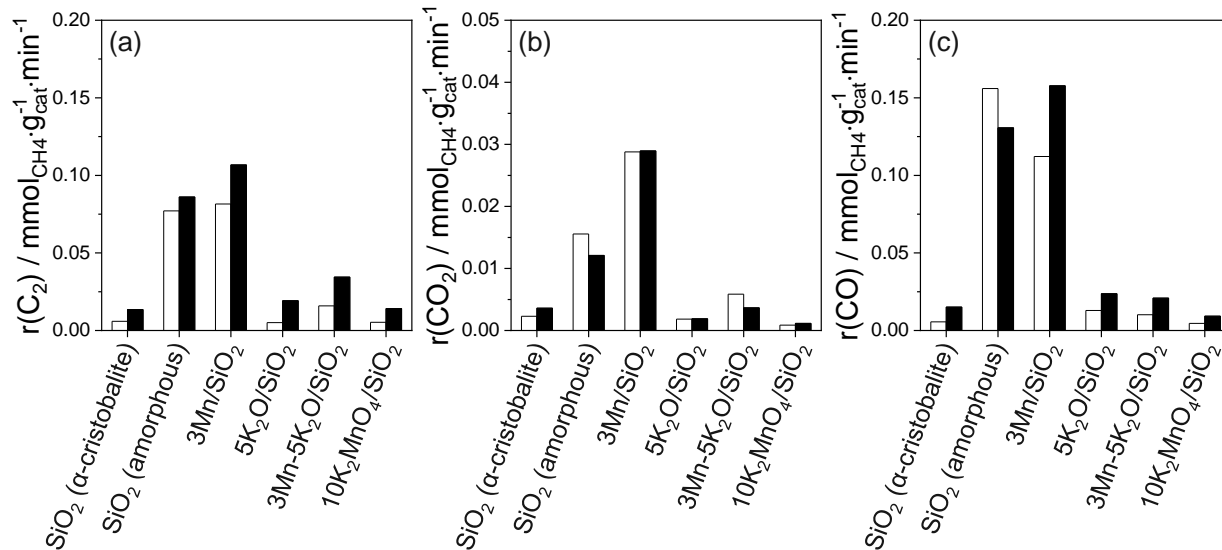

**Figure S10.** The methane conversion rate into C<sub>2</sub>, CO<sub>2</sub> and CO for the OCM reaction without (white bars) and with 30 vol% (black bars) co-fed H<sub>2</sub>O over different catalysts at 800 °C in steady state;  $0.001 \leq X(\text{CH}_4) \leq 0.003$  for SiO<sub>2</sub> (α-cristobalite),  $0.02 \leq X(\text{CH}_4) \leq 0.04$  for all other catalysts.

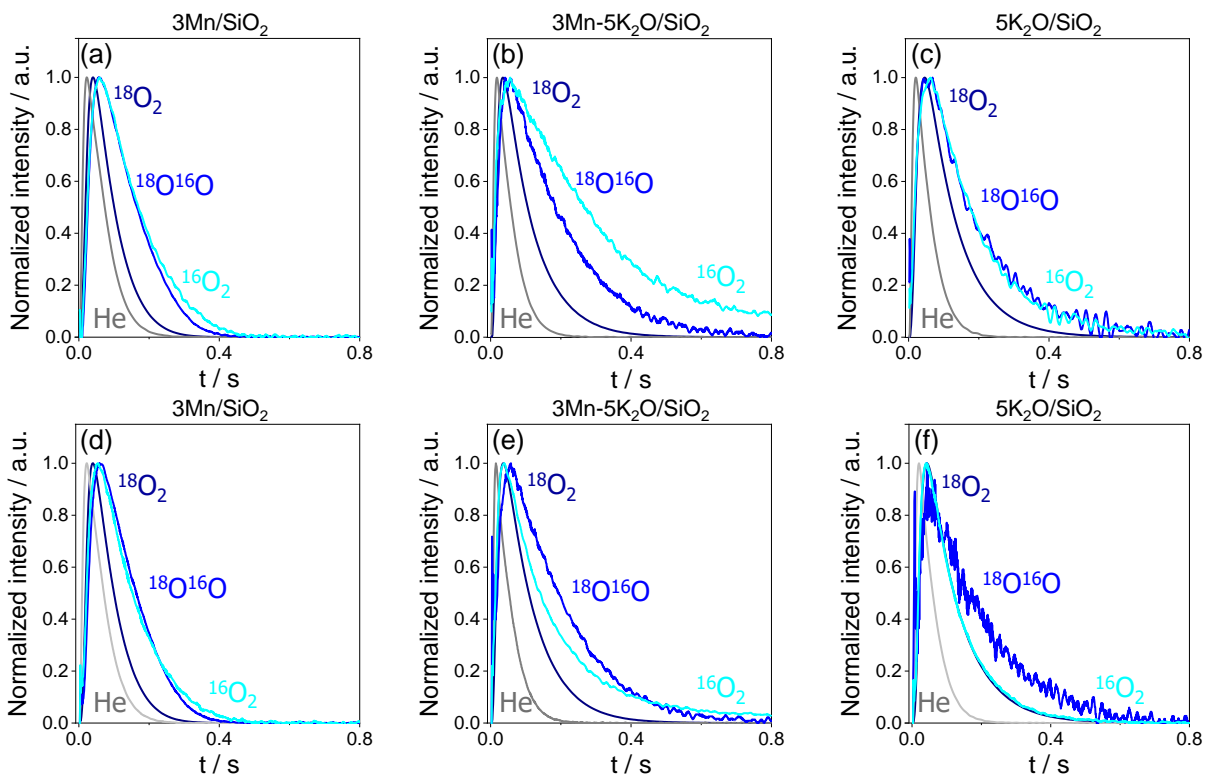

**Figure S11.** Height-normalized transient responses of carbon-containing products after pulsing of (a-c)  $^{18}\text{O}_2:\text{CH}_4:\text{He} = 1:8:2$  or (d-f)  $^{18}\text{O}_2:\text{CH}_4:\text{H}_2\text{O}:\text{He} = 1:8:0.85:2$  mixtures at  $800^\circ\text{C}$  over different catalysts.
